# Supplementary material for: Effects of Rhizosphere Microbial Communities on Cucumber Fusarium wilt Disease Suppression
Source: MDPI journal article supplement (doi:10.3390/microorganisms11061576), 2023-06-14
Supplement: s1 [file s1]

**Table S1.** Soil physical and chemical properties of HR, R and S.

| Sample | EC           | AN        | AP        | AK      | AFc       | ECa        | ACu      | pH       | S-DHA    | S-SR           | S-UR   | MBC     |
|--------|--------------|-----------|-----------|---------|-----------|------------|----------|----------|----------|----------------|--------|---------|
|        | (us/cm)      | (mg/kg)   | (mg/kg)   | (mg/kg) | (mg/kg)   | (cmol/kg)  | (ppm)    |          | (U/g)    | (U/g)          | (U/g)  | (g/kg)  |
| S      | 439.00±15.30 | 138.79±3. | 15.91±0.1 | 468.89± | 20.75±0.6 | 6.39±0.02c | 8.69±0.1 | 7.78±0.0 | 2.90±0.1 | 18.23<br>±0.07 | 79.52± | 0.49±0. |
|        | a            | 98a       | 8a        | 22.39a  | 9a        |            | 4c       | 2a       | 1a       | a              | 0.60a  | 03a     |
| R      | 257.25±2.99b | 109.74±2. | 9.89±0.49 | 418.59± | 14.77±0.4 | 6.85±0.03a | 12.18±0. | 7.80±0.0 | 1.35±0.1 | 14.38<br>±0.15 | 61.48± | 0.30±0. |
|        |              | 09c       | c         | 20.23b  | 4c        |            | 11a      | 1a       | 6c       | c              | 0.86c  | 03c     |
| HR     | 262.25±7.93b | 122.82±4. | 11.71±0.3 | 414.98± | 16.71±0.2 | 7.23±0.05b | 10.03±0. | 7.77±0.0 | 1.90±0.1 | 16.28<br>±0.10 | 72.11± | 0.38±0. |
|        |              | 07b       | 7b        | 22.65b  | 6b        |            | 34b      | 1a       | 1b       | b              | 0.96b  | 03b     |

\* Soil physical and chemical properties of S, R and HR. Values are means ± standard error (SE), n=3. Different letters in the columns indicate significant differences between means (p<0.05).

**Table S2.** Bacterial alpha diversity index table.

| Sample | Chao1          | Shannon   | Simpson   |
|--------|----------------|-----------|-----------|
| S      | 3299.79±205.84 | 9.54±0.03 | 0.10±0.00 |
| R      | 3126.10±41.39  | 9.37±0.05 | 0.10±0.00 |
| HR     | 3188.32±154.86 | 9.52±0.09 | 0.10±0.00 |

\* Bacterial alpha diversity index table. The value is mean ± standard error (SE), n = 3.

**Table S3.** Fungal alpha diversity index table.

| Sample | Chao1        | Shannon   | Simpson   |
|--------|--------------|-----------|-----------|
| S      | 253.23±36.21 | 3.33±0.41 | 0.79±0.08 |
| R      | 265.34±58.30 | 3.18±0.41 | 0.77±0.07 |
| HR     | 229.16±53.14 | 3.30±0.16 | 0.82±0.01 |

\* Fungal alpha diversity index table. The value is mean ± standard error (SE), n = 3.



A

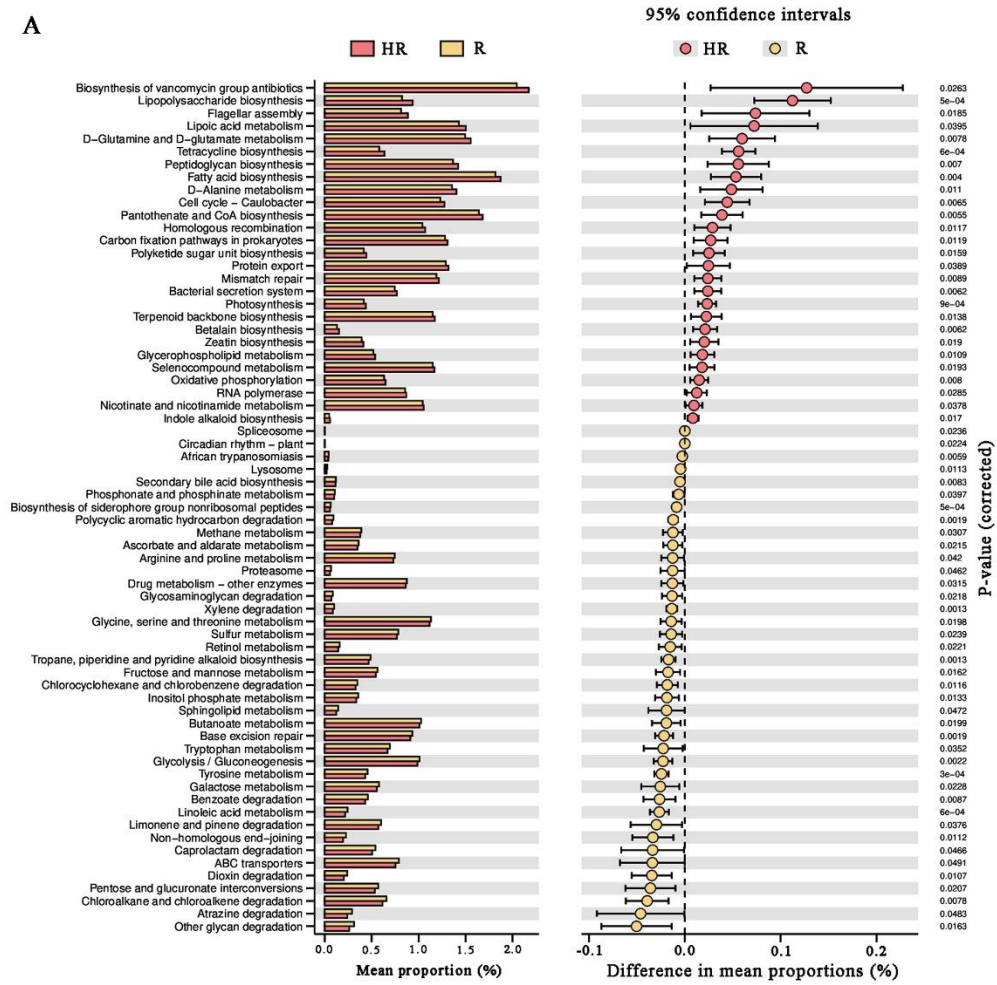

B

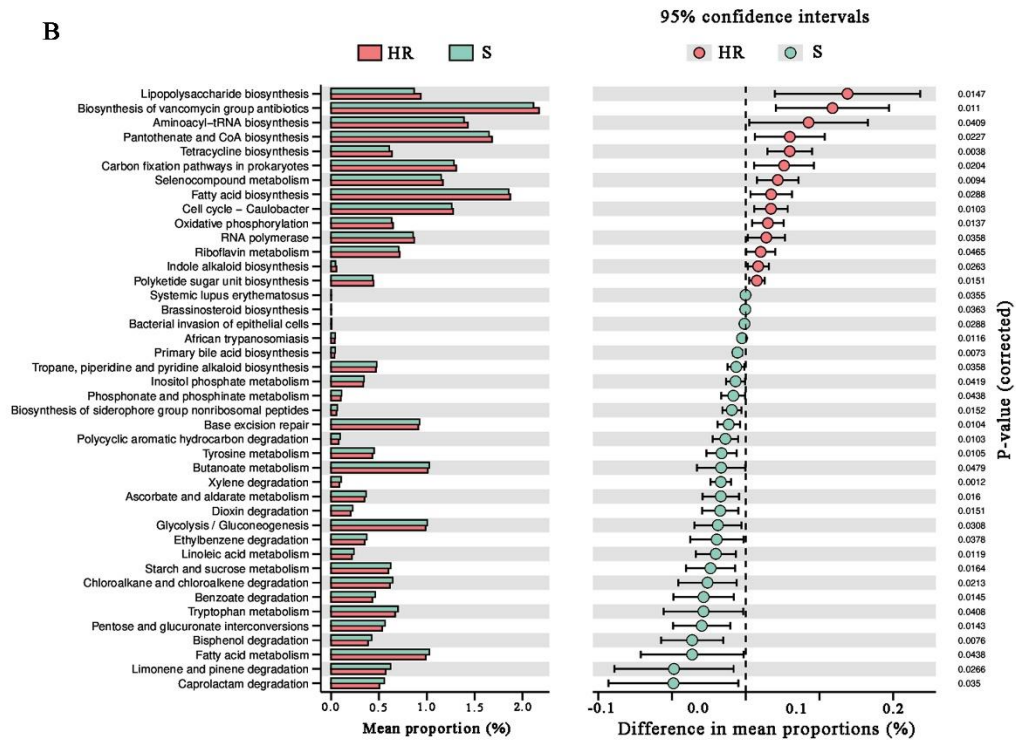

**Figure S2.** Prediction and comparison of rhizosphere bacterial community functions. The changes of bacterial functional group composition were inferred by PICRUST2. STAMP software was used to analyze the difference of KEGG function between HR and R (A) and HR and S (B), and Welch 's two-sided t-test and Bonferroni multiple test correction method was used. The abscissa of the left column graph represents the average value of a certain function percentage, the ordinate represents the function name, and different colors represent different groups. The figure on the right represents the proportion of species abundance differences within the set confidence interval.

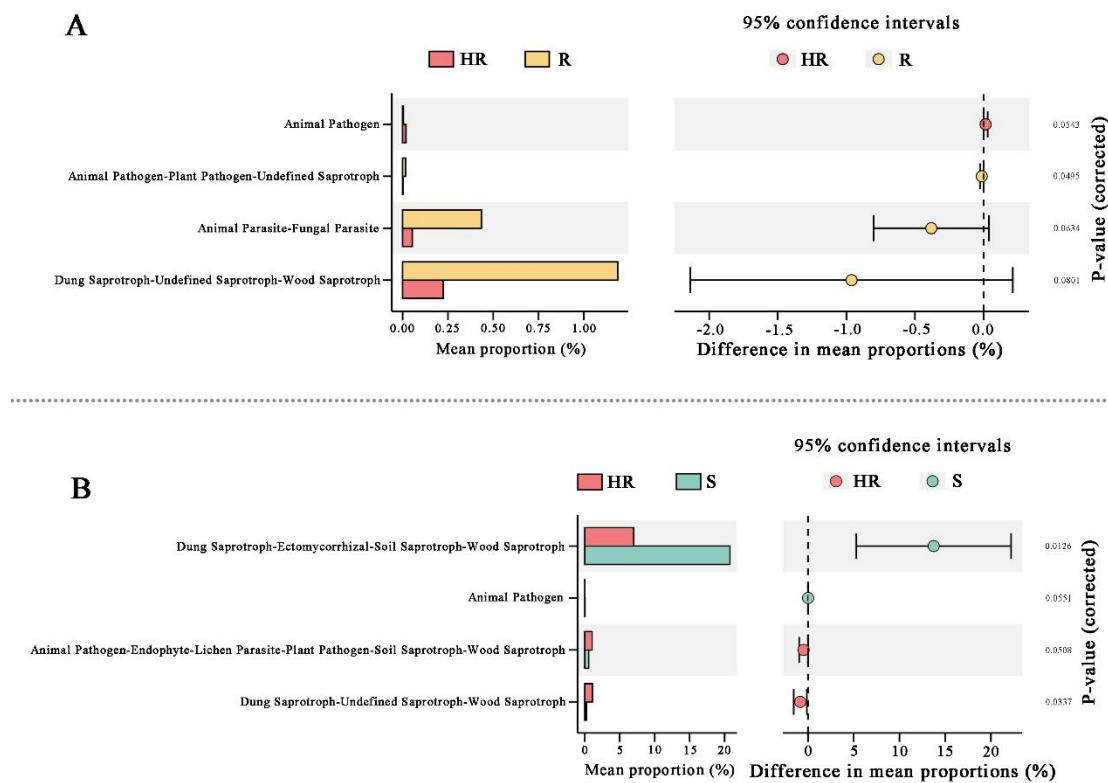

**Figure S3.** Prediction and comparison of rhizosphere fungal community functions. The changes of bacterial functional group composition were inferred by FUNGuild. STAMP software was used to analyze the difference of KEGG function between HR and R (A) and HR and S (B), and Welch 's two-sided t-test and Bonferroni multiple test correction method was used. The abscissa of the left column graph represents the average value of a certain function percentage, the ordinate represents the function name, and different colors represent different groups. The figure on the right represents the proportion of species abundance differences within the set confidence interval.
